# Supplementary material for: Noise-Induced Variability of Immuno-PET with Zirconium-89-Labeled Antibodies: an Analysis Based on Count-Reduced Clinical Images
Source: PubMed Central journal article supplement (PMC6244539; doi:10.1007/s11307-018-1200-4), 2018-04-30
Supplement: 11307_2018_1200_MOESM1_ESM.pdf [file 11307_2018_1200_MOESM1_ESM.pdf]

## Electronic Supplementary Material

### Noise Induced Variability of Immuno-PET with Zirconium-89 Labelled Antibodies: an Analysis

#### Based on Count-Reduced Clinical Images

#### Journal: Molecular Imaging and Biology

Yvonne W.S. Jauw<sup>1</sup>, Dennis F. Heijtel<sup>2</sup>, Josée M. Zijlstra<sup>1</sup>, Otto S. Hoekstra<sup>3</sup>, Henrica C.W. de Vet<sup>4</sup>, Danielle J. Vugts<sup>3</sup>, Henk M. Verheul<sup>5</sup>, Ronald Boellaard<sup>3,6</sup>, Sonja Zweegman<sup>1</sup>, Guus A.M.S. van Dongen<sup>3</sup>, C. Willemien Menke-van der Houven van Oordt<sup>5</sup>, Adriaan A. Lammertsma<sup>3</sup>, Marc C. Huisman<sup>3</sup>

Departments of Hematology<sup>1</sup>, Radiology & Nuclear Medicine<sup>3</sup>, Epidemiology and Biostatistics<sup>4</sup> and Medical Oncology<sup>5</sup>, VU University Medical Center, Amsterdam, The Netherlands

<sup>2</sup> Philips Healthcare, Best, the Netherlands

<sup>6</sup> Department of Nuclear Medicine and Molecular Imaging, University Medical Center Groningen, Groningen, The Netherlands

First/corresponding author:

Yvonne W.S. Jauw

Department of Hematology

De Boelelaan 1117, 1081 HV Amsterdam, The Netherlands

Phone/Fax: +31 20 4442604 / + 31 20 444 2601

Email: yws.jauw@vumc.nl

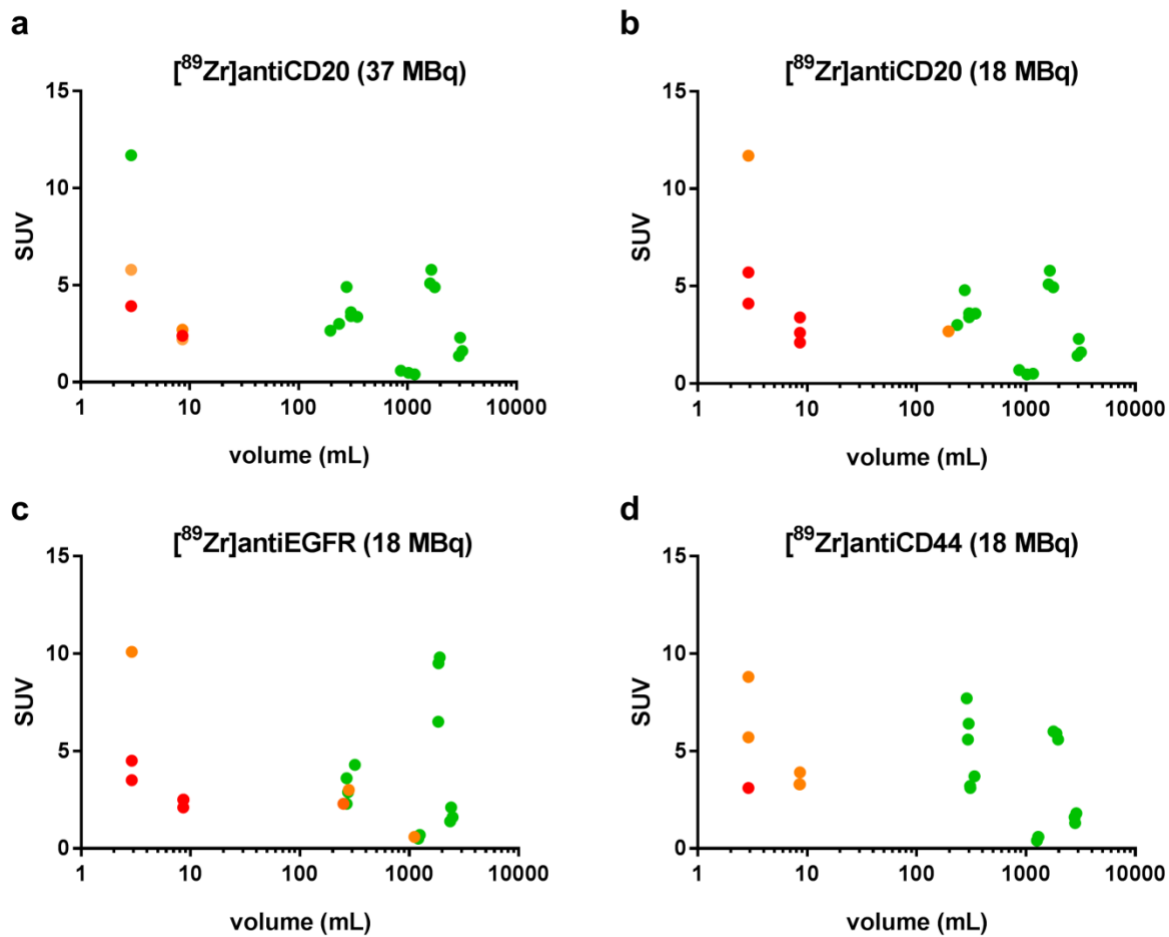

**Supplemental Fig. 1** Noise induced variability (RC in color, green 0-10%, orange 10 to 20%, red >20%) as a function of SUV and volume for all normal tissue VOI for (a)  $[^{89}\text{Zr}]$ antiCD20; 37MBq<sub>74inj</sub> (b)  $[^{89}\text{Zr}]$ antiCD20; 18MBq<sub>74inj</sub> (c)  $[^{89}\text{Zr}]$ antiEGFR; 18 MBq<sub>37inj</sub> and (d)  $[^{89}\text{Zr}]$ antiCD44; 18 MBq<sub>37inj</sub>.

**Supplemental Table 1 Delineated organ and tumour volumes**

|                                                        | Volume (mL)      |
|--------------------------------------------------------|------------------|
| Brain                                                  | 1190 ± 204       |
| Kidney                                                 | 304 ± 79         |
| Lung                                                   | 2788 ± 754       |
| Spleen                                                 | 275 ± 163        |
| Liver                                                  | 1817 ± 362       |
| Tumour                                                 |                  |
| <sup>89</sup> Zr-antiCD20                              | 5.9 (1.5-261.4)  |
| <sup>89</sup> Zr-antiEGFR                              | 3.2 (1.6-480.3)  |
| <sup>89</sup> Zr-antiCD44                              | 8.0 (1.80-467.4) |
| Organ volumes (average ± SD), all mAbs, all timepoints |                  |
| Tumour volumes (median, range), last time point        |                  |

**Supplemental Table 2 Normal tissue and tumour uptake of Zr-89-mAbs**

| VOI type            | <sup>89</sup> Zr]antiCD20 |                        |                        |                         |                        |                        | <sup>89</sup> Zr]antiEGFR |                   |                    | <sup>89</sup> Zr]antiCD44 |                  |                  |
|---------------------|---------------------------|------------------------|------------------------|-------------------------|------------------------|------------------------|---------------------------|-------------------|--------------------|---------------------------|------------------|------------------|
|                     | 37 MBq <sub>74inj</sub>   |                        |                        | 18 MBq <sub>74inj</sub> |                        |                        | 18 MBq <sub>37inj</sub>   |                   |                    | 18 MBq <sub>37inj</sub>   |                  |                  |
|                     | D0<br>n=7 <sup>a</sup>    | D3<br>n=6 <sup>b</sup> | D6<br>n=6 <sup>c</sup> | D0<br>n=7 <sup>b</sup>  | D3<br>n=6 <sup>a</sup> | D6<br>n=6 <sup>c</sup> | D0<br>n=6 <sup>d</sup>    | D3<br>n=6         | D6<br>n=6          | D0<br>n=12                | D1<br>n=12       | D4<br>n=12       |
| Brain               | 0.6<br>(0.5-0.7)          | 0.5<br>(0.4-0.6)       | 0.5<br>(0.4-0.6)       | 0.7<br>(0.7-0.9)        | 0.5<br>(0.4-0.6)       | 0.5<br>(0.4-0.5)       | 0.7<br>(0.6-1.0)          | 0.5<br>(0.3-0.6)  | 0.5<br>(0.4-0.7)   | 0.7<br>(0.6-0.7)          | 0.6<br>(0.4-0.7) | 0.4<br>(0.4-0.5) |
| Kidney              | 3.2<br>(3.0-3.9)          | 3.5<br>(3.1-4.2)       | 3.2<br>(1.4-2.4)       | 3.2<br>(3.0-3.8)        | 3.5<br>(3.0-4.1)       | 3.4<br>(3.2-4.1)       | 3.6<br>(3.1-4.1)          | 3.2<br>(1.9-3.8)  | 3.0<br>(2.5-3.4)   | 3.4<br>(2.9-3.6)          | 3.8<br>(3.1-4.4) | 3.1<br>(2.4-3.4) |
| Lung                | 2.3<br>(1.9-2.4)          | 1.6<br>(1.4-1.7)       | 1.5<br>(1.1-1.6)       | 2.3<br>(2.2-2.4)        | 1.6<br>(1.5-1.7)       | 1.5<br>(1.2-1.6)       | 1.9<br>(1.7-2.8)          | 1.5<br>(0.8-2.1)  | 1.8<br>(1.1-1.9)   | 1.8<br>(1.4-2.0)          | 1.5<br>(1.3-1.9) | 1.3<br>(1.1-1.4) |
| Spleen              | 4.7<br>(4.2-5.7)          | 3.1<br>(2.7-3.3)       | 2.7<br>(2.3-3.0)       | 4.7<br>(4.2-5.7)        | 3.0<br>(2.7-3.2)       | 2.9<br>(2.3-3.0)       | 4.4<br>(3.4-5.1)          | 2.4<br>(1.4-3.2)  | 2.3<br>(1.8-2.8)   | 6.5<br>(5.6-8.6)          | 5.2<br>(4.4-7.7) | 4.7<br>(3.4-6.9) |
| Liver               | 5.9<br>(5.6-6.5)          | 5.3<br>(4.6-5.7)       | 4.9<br>(4.0-5.8)       | 5.9<br>(5.6-6.4)        | 5.3<br>(4.5-5.7)       | 4.8<br>(4.2-5.8)       | 6.3<br>(5.7-7.6)          | 9.7<br>(7.9-10.6) | 10.3<br>(7.2-11.8) | 5.6<br>(5.2-6.0)          | 5.8<br>(4.8-6.2) | 5.5<br>(5.1-6.3) |
| Combined            | 3.6<br>(2.2-5.4)          | 3.0<br>(1.5-5.7)       | 2.6<br>(1.4-3.9)       | 3.4<br>(2.2-5.4)        | 2.9<br>(1.5-3.9)       | 2.9<br>(1.5-3.9)       | 3.2<br>(1.8-4.9)          | 2.2<br>(0.8-3.8)  | 2.1<br>(1.2-4.0)   | 3.2<br>(1.3-5.7)          | 3.7<br>(1.3-5.0) | 3.0<br>(1.1-5.0) |
| Blood pool          | 11.5<br>(10.5-12.6)       | 5.9<br>(4.9-6.4)       | 4.2<br>(2.9-4.7)       | 11.2<br>(10.8-12.7)     | 5.9<br>(5.0-6.3)       | 3.9<br>(2.9-5.5)       | 9.5<br>(7.8-13.1)         | 4.7<br>(2.3-6.3)  | 4.0<br>(1.9-4.7)   | 9.1<br>(7.4-11.2)         | 5.8<br>(4.3-7.0) | 3.0<br>(1.9-3.9) |
| Bone marrow         | 2.8<br>(2.4-2.9)          | 1.9<br>(1.8-2.8)       | 2.2<br>(1.8-3.1)       | 2.7<br>(2.2-2.9)        | 1.9<br>(1.7-2.7)       | 3.5<br>(2.6-4.1)       | 2.6<br>(2.1-3.0)          | 2.3<br>(1.5-2.8)  | 2.5<br>(1.8-3.0)   | 3.9<br>(3.1-4.5)          | 3.0<br>(2.4-4.2) | 3.2<br>(2.8-4.9) |
| Tumour              | -                         | D3<br>n=26             | D6<br>n=32             | -                       | D3<br>n=26             | D6<br>n=32             | -                         | D3<br>n=7         | D6<br>n=7          | -                         | D1<br>n=19       | D4<br>n=19       |
| SUV <sub>max</sub>  | -                         | 10.7<br>(8.2-13.1)     | 11.5<br>(6.8-17.8)     | -                       | 11.1<br>(7.9-14.3)     | 12.7<br>(8.2-19.8)     | -                         | 5.5<br>(4.6-7.0)  | 7.7<br>(4.9-10.6)  | -                         | 4.0<br>(2.6-5.1) | 5.1<br>(3.0-9.0) |
| SUV <sub>peak</sub> | -                         | 8.8<br>(6.5-10.4)      | 8.4<br>(4.0-14.8)      | -                       | 9.0<br>(6.3-11.2)      | 9.2<br>(6.8-15.5)      | -                         | 4.8<br>(4.0-5.7)  | 6.3<br>(3.9-8.6)   | -                         | 3.5<br>(2.1-4.7) | 4.2<br>(2.5-7.4) |
| SUV <sub>mean</sub> | -                         | 6.9<br>(5.7-7.8)       | 7.2<br>(4.0-10.7)      | -                       | 6.3<br>(4.7-8.1)       | 7.5<br>(4.7-10.8)      | -                         | 3.3<br>(2.5-4.4)  | 3.9<br>(2.4-5.6)   | -                         | 2.2<br>(1.7-2.9) | 3.3<br>(2.0-4.9) |

Data is presented as median SUV (interquartile range). SUV calculated as the average of split 1 and split 2.

n = number of VOIs per group.

Combined = all VOIs of brain, kidney, lung, spleen and liver, analyzed together as one group.

<sup>a</sup> No brain VOI obtained in patient 2 (outside field of view) and 6 (tumour localization in the nasopharynx).

<sup>b</sup> No brain VOI obtained in patient 6 (tumour localization in the nasopharynx).

<sup>c</sup> No kidney, lung, spleen, liver, blood pool, bone marrow in patient 2 (outside field of view). No brain VOI obtained in patient 6 (tumour localization in the nasopharynx). No brain VOI obtained in patient 1 (mismatch between low dose CT and PET image due to patient movement).

<sup>d</sup> No brain VOI obtained in patient 8 (outside field of view).

**Supplemental Table 3 Mean differences (%) for normal tissue and tumour uptake of Zr-89-mAbs**

|                     | [ <sup>89</sup> Zr]antiCD20 |            |            |                         |            |            | [ <sup>89</sup> Zr]antiEGFR |           |           | [ <sup>89</sup> Zr]antiCD44 |            |            |
|---------------------|-----------------------------|------------|------------|-------------------------|------------|------------|-----------------------------|-----------|-----------|-----------------------------|------------|------------|
|                     | 37 MBq <sub>74inj</sub>     |            |            | 18 MBq <sub>74inj</sub> |            |            | 18 MBq <sub>37inj</sub>     |           |           | 18 MBq <sub>37inj</sub>     |            |            |
|                     | D0<br>n=7                   | D3<br>n=6  | D6<br>n=6  | D0<br>n=7               | D3<br>n=6  | D6<br>n=6  | D0<br>n=6                   | D3<br>n=6 | D6<br>n=6 | D0<br>n=12                  | D1<br>n=12 | D4<br>n=12 |
| Brain               | -1.5                        | 2.4        | 0.3        | 0.3                     | 2.0        | -2.9       | 0.8                         | -0.6      | 0.9       | -1.3                        | 0.6        | 0.5        |
| Kidney              | 0.1                         | -1.5       | -2.7       | -0.1                    | 0.4        | 1.3        | -1.8                        | 1.5       | -0.8      | 0.2                         | 0.4        | -0.6       |
| Lung                | 0.2                         | -0.1       | 0.2        | 0.2                     | 0.0        | 0.5        | -0.2                        | 0.3       | -0.5      | 0.1                         | -0.1       | 1.4        |
| Spleen              | 0.2                         | 0.0        | -0.6       | 0.0                     | 2.7        | -8.3       | 2.1                         | 2.3       | -2.4      | 0.0                         | -0.4       | 0.8        |
| Liver               | -0.1                        | 0.2        | 0.6        | -0.1                    | -0.8       | -0.9       | 0.7                         | 0.2       | -0.4      | 0.7                         | 0.0        | 0.0        |
| Combined            | -0.2                        | 0.1        | -0.6       | 0.0                     | 0.9        | -1.7       | 0.3                         | 0.7       | -0.7      | -0.1                        | 0.1        | 0.4        |
|                     |                             |            |            |                         |            |            |                             |           |           |                             |            |            |
| Blood pool          | 0.4                         | 0.9        | -12.7      | 0.4                     | 6.8        | -6.3       | 4.3                         | -3.1      | -2.1      | -2.9                        | 2.3        | 0.5        |
| Bone marrow         | -5.7                        | 3.4        | 1.6        | -8.5                    | -7.0       | 13.9       | -2.3                        | -0.1      | 6.3       | 0.3                         | -0.9       | -5.5       |
|                     |                             |            |            |                         |            |            |                             |           |           |                             |            |            |
| Tumour              | -                           | D3<br>n=26 | D6<br>n=32 | -                       | D3<br>n=26 | D6<br>n=32 | -                           | D3<br>n=7 | D6<br>n=7 | -                           | D1<br>n=19 | D4<br>n=19 |
| SUV <sub>max</sub>  | -                           | -4.1       | 0.3        | -                       | -5.0       | 1.7        | -                           | 9.5       | 1.3       | -                           | -3.0       | -4.8       |
| SUV <sub>peak</sub> | -                           | -4.9       | 0.4        | -                       | -4.7       | 2.0        | -                           | 9.4       | 4.5       | -                           | -2.6       | -3.5       |
| SUV <sub>mean</sub> | -                           | -6.5       | 0.3        | -                       | -1.0       | 2.7        | -                           | 5.6       | 2.1       | -                           | -1.3       | -2.3       |

**Supplemental Table 4 ICC for normal tissue uptake of Zr-89-mAbs**

| ICC (lower-upper 95% CI) | <sup>89</sup> Zr]antiCD20 (37 MBq <sub>74inj</sub> ) |                  |                  |
|--------------------------|------------------------------------------------------|------------------|------------------|
|                          | D0                                                   | D3               | D6               |
| Brain                    | 0.92 (0.16-0.99)                                     | 0.99 (0.90-1.00) | 0.99 (0.89-1.00) |
| Kidney                   | 1.00 (0.99-1.00)                                     | 0.99 (0.94-1.00) | 0.99 (0.85-1.00) |
| Lung                     | 1.00 (0.99-1.00)                                     | 1.00 (1.00-1.00) | 1.00 (1.00-1.00) |
| Spleen                   | 1.00 (0.99-1.00)                                     | 0.97 (0.81-1.00) | 0.98 (0.81-1.00) |
| Liver                    | 1.00 (0.99-1.00)                                     | 1.00 (0.99-1.00) | 1.00 (0.99-1.00) |
|                          |                                                      |                  |                  |
|                          | <sup>89</sup> Zr]antiCD20 (18 MBq <sub>74inj</sub> ) |                  |                  |
|                          | D0                                                   | D3               | D6               |
| Brain                    | 1.00 (0.97-1.00)                                     | 0.96 (0.73-1.00) | 1.00 (0.96-1.00) |
| Kidney                   | 0.99 (0.97-1.00)                                     | 0.98 (0.91-1.00) | 0.98 (0.83-1.00) |
| Lung                     | 1.00 (0.98-1.00)                                     | 1.00 (0.99-1.00) | 1.00 (0.99-1.00) |
| Spleen                   | 0.99 (0.96-1.00)                                     | 0.86 (0.39-0.98) | 0.81 (0.10-0.98) |
| Liver                    | 1.00 (0.99-1.00)                                     | 1.00 (0.78-1.00) | 0.99 (0.94-1.00) |
|                          |                                                      |                  |                  |
|                          | <sup>89</sup> Zr]antiEGFR (18 MBq <sub>37inj</sub> ) |                  |                  |
|                          | D0                                                   | D3               | D6               |
| Brain                    | 1.00 (0.97-1.00)                                     | 0.99 (0.94-1.00) | 0.99 (0.97-1.00) |
| Kidney                   | 0.97 (0.85-1.00)                                     | 0.99 (0.96-1.00) | 0.97 (0.78-1.00) |
| Lung                     | 1.00 (1.00-1.00)                                     | 1.00 (1.00-1.00) | 1.00 (0.99-1.00) |
| Spleen                   | 0.99 (0.92-1.00)                                     | 1.00 (0.97-1.00) | 0.98 (0.89-1.00) |
| Liver                    | 1.00 (0.99-1.00)                                     | 1.00 (0.99-1.00) | 1.00 (1.00-1.00) |
|                          |                                                      |                  |                  |
|                          | <sup>89</sup> Zr]antiCD44 (18 MBq <sub>37inj</sub> ) |                  |                  |
|                          | D0                                                   | D1               | D4               |
| Brain                    | 1.00 (0.99-1.00)                                     | 1.00 (1.00-1.00) | 0.99 (0.97-1.00) |
| Kidney                   | 1.00 (0.99-1.00)                                     | 1.00 (0.99-1.00) | 0.98 (0.93-0.99) |
| Lung                     | 1.00 (1.00-1.00)                                     | 1.00 (1.00-1.00) | 0.99 (0.97-1.00) |
| Spleen                   | 1.00 (1.00-1.00)                                     | 1.00 (1.00-1.00) | 1.00 (0.99-1.00) |
| Liver                    | 1.00 (1.00-1.00)                                     | 1.00 (1.00-1.00) | 1.00 (1.00-1.00) |
